# Supplementary material for: The incidence and survival of cervical, ovarian, and endometrial cancer in Korea, 1999-2017: Korea Central Cancer Registry
Source: PubMed Central journal article supplement — Obstet Gynecol Sci. 2021 Aug 17;64(5):444–53. doi: 10.5468/ogs.21116 (PMC8458610; doi:10.5468/ogs.21116), 2021-08-17
Supplement: ogs-21116-suppl4.pdf [file ogs-21116-suppl4.pdf]

**Supplementary Table 4.** Characteristics of age according to cancer type

| Characteristic | 25% Q1 | Median | 75% Q3 |
|----------------|--------|--------|--------|
| Cervix         | 42     | 51     | 63     |
| Endometrium    | 46     | 53     | 60     |
| POFT           | 45     | 53     | 63     |

POFT, primary peritoneal, ovarian epithelial, fallopian tube.
